# Supplementary figures and images for: The vortex wake of blackcaps (Sylvia atricapillaL.) measured using high-speed digital particle image velocimetry (DPIV)
Source: Oxford University Press journal article supplement (doi:10.1242/jeb.034454), 2009-10-03

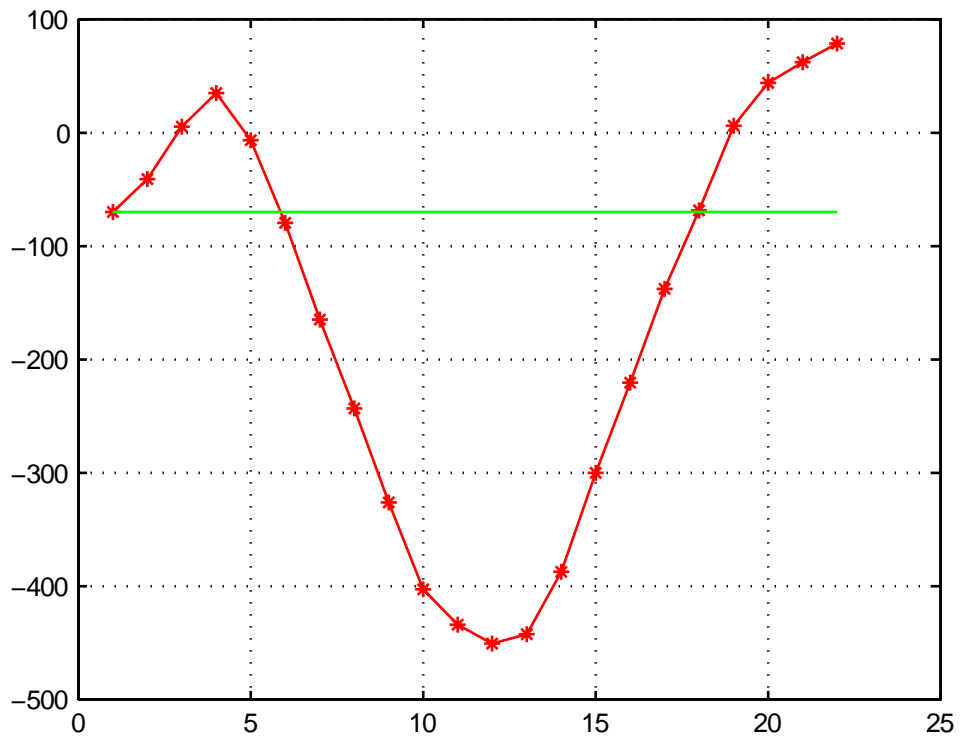

Supplement: jeb034454-figs1.pdf [file jeb034454-figs1.pdf]
